# Supplementary material
Source: PubMed Central journal article supplement (PMC8185631)
Supplement: jamapediatr-e211319-s001.pdf [file jamapediatr-e211319-s001.pdf]

## Supplementary Online Content

Newgard CD, Lin A, Olson LM, et al. Evaluation of emergency department pediatric readiness and outcomes among US trauma centers. *JAMA Pediatr*. Published online June 7, 2021. doi:10.1001/jamapediatrics.2021.1319

**eFigure.** Schematic of Cohort Creation

**eTable 1.** Procedures and Diagnoses Among Injured Children Defining Need for “Early Critical Resources” Within 24 Hours of Emergency Department Presentation (n = 32,671)

**eTable 2.** Percent Missingness of Variables (n = 372,004)

**eTable 3.** Hospital Characteristics by Quartile of Emergency Department (ED) Pediatric Readiness Among 832 Trauma Center EDs

**eTable 4.** Estimated Annual Number of Lives Saved Among Injured Children by Shifting Their Care From Lower-Readiness Emergency Departments (EDs) to High-Readiness EDs

**eTable 5.** Stratified Analysis by Transfer Status for the Association Between ED Pediatric Readiness, In-Hospital Mortality, and In-Hospital Complications

**eTable 6.** Stratified Analysis by Age Group for the Association Between ED Pediatric Readiness, In-Hospital Mortality, and In-Hospital Complications.

**eTable 7.** Stratified Analysis by *Calendar Year* for the Association Between ED Pediatric Readiness, In-Hospital Mortality, and In-Hospital Complications

**eTable 8.** Sensitivity Analyses of Emergency Department Pediatric Readiness and In-Hospital Mortality, With the Sequential Addition of Hospital-Level Variables and Year in the Model (n = 372,004)

This supplementary material has been provided by the authors to give readers additional information about their work.

eFigure. Schematic of cohort creation.

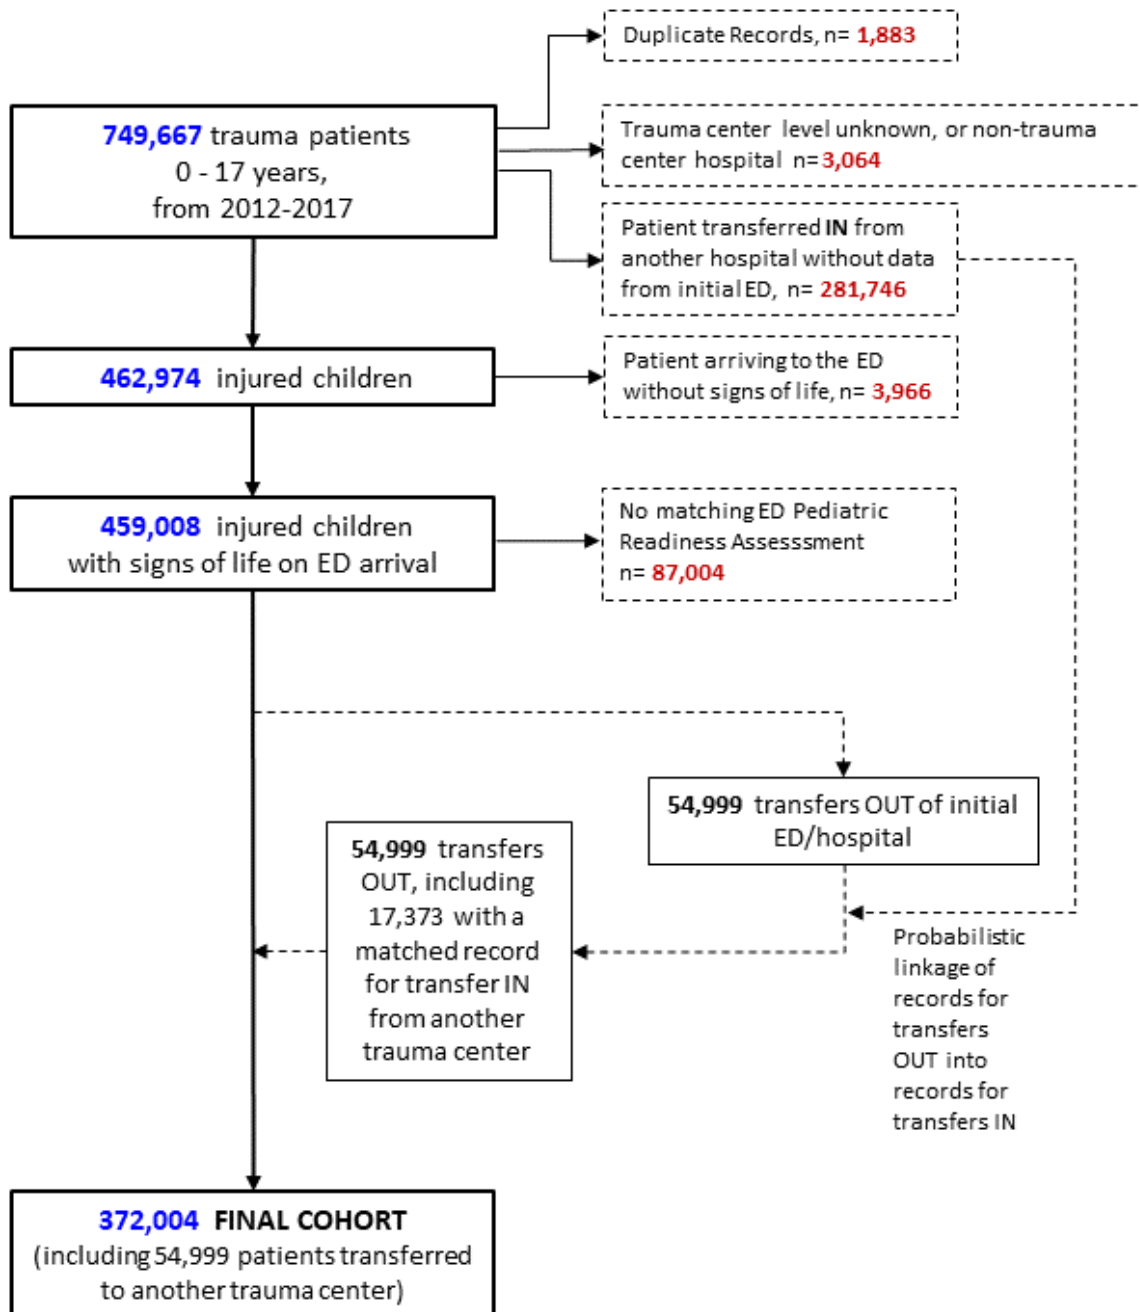

**eTable 1. Procedures and diagnoses among injured children defining need for “early critical resources” within 24 hours of emergency department presentation (n = 32,671).**

| Total n=32,671    | n (%)          |
|-------------------|----------------|
| Abdominal         | 7,701 (23.6%)  |
| Airway            | 16,331 (50.0%) |
| Blood transfusion | 5,221 (16.0%)  |
| Brain             | 5,284 (16.2%)  |
| Cardiac           | 1,724 (5.3%)   |
| ECMO              | 26 (0.1%)      |
| Neck              | 420 (1.3%)     |
| Spine             | 1,539 (4.7%)   |
| Thorax            | 5,340 (16.3%)  |
| Vascular          | 3,458 (10.6%)  |
| Vasopressors      | 98 (0.3%)      |
| Spine injury      | 3,115 (9.5%)   |

**eTable 2. Percent missingness of variables (n = 372,004).**

| <b>Variable</b>                                                 | <b>Percent Missing</b> |
|-----------------------------------------------------------------|------------------------|
| ED weighted Pediatric Readiness Score                           | 0 (0.0%)               |
| Sex                                                             | 0 (0.0%)               |
| Age                                                             | 0 (0.0%)               |
| Race                                                            | 14,908 (4.0%)          |
| Any comorbid conditions                                         | 0 (0.0%)               |
| Injury mechanism                                                | 25,096 (6.7%)          |
| Arrival by ambulance                                            | 10,101 (2.7%)          |
| Inter-hospital transfer                                         | 0 (0.0%)               |
| SBP                                                             | 38,782 (10.4%)         |
| GCS                                                             | 27,599 (7.4%)          |
| Region                                                          | 0 (0.0%)               |
| Injury severity (ISS, AIS)                                      | 697 (0.2%)             |
| Any airway or ventilatory support                               | 34,872 (9.4%)          |
| Blood transfusion                                               | 37,542 (10.1%)         |
| Non-orthopedic surgery (spine, brain, thorax, abdomen, or neck) | 26,808 (7.2%)          |
| Orthopedic surgery                                              | 26,990 (7.3%)          |
| In-hospital complications†                                      | 38,083 (10.2%)         |
| In-hospital mortality†                                          | 34,365 (9.2%)          |

\*SBP = systolic blood pressure; GCS = Glasgow Coma Scale; ISS = Injury Severity Score; AIS = Abbreviated Injury Scale.

†In-hospital mortality and complications were primarily missing among transfer patients without a record from the second hospital.

**eTable 3. Hospital characteristics by quartile of emergency department (ED) pediatric readiness among 832 trauma center EDs.**

|                                                                 | ED weighted pediatric readiness score                |                                                               |                                              |                                              |                                                               |
|-----------------------------------------------------------------|------------------------------------------------------|---------------------------------------------------------------|----------------------------------------------|----------------------------------------------|---------------------------------------------------------------|
|                                                                 | Overall<br>n=832 facilities<br>100%<br>Score: 29-100 | 1st Quartile (least<br>ready) n=217,<br>26.1%<br>Score: 29-62 | 2nd Quartile<br>n=199, 23.9%<br>Score: 63-78 | 3rd Quartile<br>n=221, 26.6%<br>Score: 79-92 | 4th Quartile<br>(most ready)<br>n=195, 23.4%<br>Score: 93-100 |
| <b>Facility characteristics, n (%)</b>                          |                                                      |                                                               |                                              |                                              |                                                               |
| Initial hospital trauma level                                   |                                                      |                                                               |                                              |                                              |                                                               |
| I                                                               | 166 (19.9%)                                          | 25 (11.5%)                                                    | 24 (12.1%)                                   | 55 (24.9%)                                   | 62 (31.8%)                                                    |
| II                                                              | 257 (30.9%)                                          | 52 (24.0%)                                                    | 62 (31.2%)                                   | 79 (35.8%)                                   | 64 (32.8%)                                                    |
| III/IV                                                          | 355 (42.6%)                                          | 140 (64.5%)                                                   | 111 (55.8%)                                  | 78 (35.3%)                                   | 26 (13.3%)                                                    |
| Not applicable (pediatric only)                                 | 54 (6.5%)                                            | 0 (0.0%)                                                      | 2 (1.0%)                                     | 9 (4.1%)                                     | 43 (22.1%)                                                    |
| Initial hospital pediatric trauma level                         |                                                      |                                                               |                                              |                                              |                                                               |
| I                                                               | 84 (10.1%)                                           | 1 (0.5%)                                                      | 5 (2.5%)                                     | 21 (9.5%)                                    | 57 (29.2%)                                                    |
| II                                                              | 62 (7.5%)                                            | 3 (1.4%)                                                      | 7 (3.5%)                                     | 25 (11.3%)                                   | 27 (13.8%)                                                    |
| III/IV                                                          | 48 (5.6%)                                            | 12 (5.5%)                                                     | 20 (10.1%)                                   | 13 (5.9%)                                    | 3 (1.5%)                                                      |
| Non-pediatric trauma                                            | 638 (76.7%)                                          | 201 (92.6%)                                                   | 167 (83.9%)                                  | 162 (73.3%)                                  | 108 (55.4%)                                                   |
| Initial hospital trauma level or pediatric trauma level I or II | 474 (57.0%)                                          | 77 (35.5%)                                                    | 87 (43.7%)                                   | 142 (64.3%)                                  | 168 (86.2%)                                                   |
| Annual pediatric ED volume                                      |                                                      |                                                               |                                              |                                              |                                                               |
| 1 <sup>st</sup> quartile (1-4,900)                              | 160 (19.2%)                                          | 51 (23.5%)                                                    | 45 (22.6%)                                   | 41 (18.6%)                                   | 23 (11.8%)                                                    |
| 2 <sup>nd</sup> quartile (4,900-8,400)                          | 86 (10.3%)                                           | 19 (8.8%)                                                     | 27 (13.6%)                                   | 21 (9.5%)                                    | 19 (9.7%)                                                     |
| 3 <sup>rd</sup> quartile (8,400-13,800)                         | 105 (12.6%)                                          | 13 (6.0%)                                                     | 23 (11.6%)                                   | 36 (16.3%)                                   | 33 (16.9%)                                                    |
| 4 <sup>th</sup> quartile (>13,800)                              | 186 (22.4%)                                          | 9 (4.2%)                                                      | 22 (11.1%)                                   | 67 (30.3%)                                   | 88 (45.1%)                                                    |
| Unknown                                                         | 295 (35.5%)                                          | 125 (57.6%)                                                   | 82 (41.2%)                                   | 56 (25.3%)                                   | 32 (16.3%)                                                    |
| Annual pediatric trauma volume (NTDB patients)                  |                                                      |                                                               |                                              |                                              |                                                               |
| 1 <sup>st</sup> quartile (1-24)                                 | 212 (25.5%)                                          | 96 (44.2%)                                                    | 63 (31.7%)                                   | 35 (15.8%)                                   | 18 (9.2%)                                                     |
| 2 <sup>nd</sup> quartile (25-50)                                | 203 (24.4%)                                          | 56 (25.8%)                                                    | 54 (27.1%)                                   | 59 (26.7%)                                   | 34 (17.4%)                                                    |
| 3 <sup>rd</sup> quartile (51-95)                                | 210 (25.2%)                                          | 49 (22.6%)                                                    | 57 (28.6%)                                   | 67 (30.3%)                                   | 37 (19.0%)                                                    |
| 4 <sup>th</sup> quartile (96-1,045)                             | 207 (24.9%)                                          | 16 (7.4%)                                                     | 25 (12.6%)                                   | 60 (27.1%)                                   | 106 (54.4%)                                                   |
| Patients, n (%)                                                 | 372,004 (100%)                                       | 36,171 (9.7%)                                                 | 53,269 (14.3%)                               | 86,470 (23.2%)                               | 196,094 (52.7%)                                               |

**eTable 4. Estimated annual number of lives saved among injured children by shifting their care from lower-readiness emergency departments (EDs) to high-readiness EDs.**

| % of patients shifted to highest quartile | <i>lowest</i> quartile ED readiness to highest quartile | <i>second</i> quartile ED readiness to highest quartile | <i>third</i> quartile ED readiness to highest quartile | <i>Across all quartiles</i>     |
|-------------------------------------------|---------------------------------------------------------|---------------------------------------------------------|--------------------------------------------------------|---------------------------------|
|                                           | n lives saved per year (95% CI)                         | n lives saved per year (95% CI)                         | n lives saved per year (95% CI)                        | n lives saved per year (95% CI) |
| 0% (no change)                            | 0                                                       | 0                                                       | 0                                                      | 0                               |
| 25%                                       | 7 (5-8)                                                 | 11 (9-13)                                               | 13 (9-18)                                              | 31 (23-38)                      |
| 50%                                       | 13 (10-17)                                              | 23 (19-27)                                              | 27 (18-35)                                             | 63 (49-77)                      |
| 75%                                       | 20 (15-25)                                              | 34 (28-40)                                              | 40 (27-53)                                             | 94 (72-116)                     |
| 100%                                      | 27 (20-34)                                              | 46 (37-54)                                              | 53 (36-70)                                             | 126 (97-154)                    |

\*Because there was an uneven distribution of children who died across quartiles of ED pediatric readiness, the estimated number of lives saved differs across quartiles.

**eTable 5. Stratified analysis by *transfer status* for the association between ED pediatric readiness, in-hospital mortality, and in-hospital complications.**

|                                            | In-hospital mortality OR(95%CI) | p value for trend | Mortality or any complication OR(95%CI) | p value for trend |
|--------------------------------------------|---------------------------------|-------------------|-----------------------------------------|-------------------|
| <b>Non-transfer patients (n = 317,005)</b> |                                 |                   |                                         |                   |
| <i>ED pediatric readiness score:</i>       |                                 |                   |                                         |                   |
| 1st Quartile (least ready)                 | referent                        | 0.077             | referent                                | 0.481             |
| 2nd Quartile                               | 1.34 (0.97-1.86)                |                   | 1.15 (0.91-1.46)                        |                   |
| 3rd Quartile                               | 1.01 (0.74-1.36)                |                   | 1.09 (0.88-1.35)                        |                   |
| 4th Quartile (most ready)                  | 0.69 (0.51-0.92)                |                   | 0.91 (0.74-1.12)                        |                   |
| <b>Transferred patients (n = 54,999)</b>   |                                 |                   |                                         |                   |
| <i>ED pediatric readiness score:</i>       |                                 |                   |                                         |                   |
| 1st Quartile (least ready)                 | referent                        | 0.033             | referent                                | 0.646             |
| 2nd Quartile                               | 0.99(0.65-1.49)                 |                   | 0.91(0.74-1.13)                         |                   |
| 3rd Quartile                               | 0.84(0.58-1.22)                 |                   | 0.97(0.78-1.20)                         |                   |
| 4th Quartile (most ready)                  | 0.59(0.39-0.90)                 |                   | 1.02(0.81-1.29)                         |                   |

**eTable 6. Stratified analysis by age group for the association between ED pediatric readiness, in-hospital mortality, and in-hospital complications.**

|                                      | <b>In-hospital mortality OR (95%CI)</b> | <i>p</i> -value for trend | <b>In-hospital mortality or any complication OR (95%CI)</b> | <i>p</i> -value for trend |
|--------------------------------------|-----------------------------------------|---------------------------|-------------------------------------------------------------|---------------------------|
| <b>0-4 years (n= 97,431)</b>         |                                         |                           |                                                             |                           |
| <i>ED pediatric readiness score:</i> |                                         |                           |                                                             |                           |
| 1st Quartile (least ready)           | referent                                | 0.006                     | referent                                                    | 0.038                     |
| 2nd Quartile                         | 1.24 (0.72-2.13)                        |                           | 1.08 (0.77-1.52)                                            |                           |
| 3rd Quartile                         | 0.93 (0.58-1.48)                        |                           | 1.02 (0.75-1.38)                                            |                           |
| 4th Quartile (most ready)            | 0.48 (0.31-0.76)                        |                           | 0.70 (0.51-0.96)                                            |                           |
| <b>5-12 years (n=130,614)</b>        |                                         |                           |                                                             |                           |
| <i>ED pediatric readiness score:</i> |                                         |                           |                                                             |                           |
| 1st Quartile (least ready)           | referent                                | 0.018                     | referent                                                    | 0.585                     |
| 2nd Quartile                         | 1.05 (0.61-1.80)                        |                           | 1.06 (0.74-1.51)                                            |                           |
| 3rd Quartile                         | 0.83 (0.52-1.34)                        |                           | 1.09 (0.79-1.50)                                            |                           |
| 4th Quartile (most ready)            | 0.51 (0.32-0.82)                        |                           | 0.94 (0.67-1.30)                                            |                           |
| <b>13-15 years (n= 70,672)</b>       |                                         |                           |                                                             |                           |
| <i>ED pediatric readiness score:</i> |                                         |                           |                                                             |                           |
| 1st Quartile (least ready)           | referent                                | 0.011                     | referent                                                    | 0.396                     |
| 2nd Quartile                         | 1.13 (0.67-1.90)                        |                           | 1.07 (0.75-1.51)                                            |                           |
| 3rd Quartile                         | 0.86 (0.53-1.39)                        |                           | 1.02 (0.75-1.39)                                            |                           |
| 4th Quartile (most ready)            | 0.49 (0.31-0.77)                        |                           | 0.86 (0.64-1.16)                                            |                           |
| <b>16-17 years (n= 73,287)</b>       |                                         |                           |                                                             |                           |
| <i>ED pediatric readiness score:</i> |                                         |                           |                                                             |                           |
| 1st Quartile (least ready)           | referent                                | 0.843                     | referent                                                    | 0.859                     |
| 2nd Quartile                         | 1.51 (1.01-2.25)                        |                           | 1.12 (0.87-1.44)                                            |                           |
| 3rd Quartile                         | 1.14 (0.79-1.65)                        |                           | 1.14 (0.90-1.44)                                            |                           |
| 4th Quartile (most ready)            | 0.89 (0.62-1.29)                        |                           | 1.02 (0.81-1.28)                                            |                           |

**eTable 7. Stratified analysis by calendar year for the association between ED pediatric readiness, in-hospital mortality, and in-hospital complications.**

|                                      | In-hospital mortality OR (95%CI) | p-value for trend | In-hospital mortality or any complication OR (95%CI) | p-value for trend |
|--------------------------------------|----------------------------------|-------------------|------------------------------------------------------|-------------------|
| <b>Years 2012-2013*</b> (n=125,991)  |                                  |                   |                                                      |                   |
| <i>ED pediatric readiness score:</i> |                                  |                   |                                                      |                   |
| 1st Quartile (least ready)           | referent                         | 0.025             | referent                                             | 0.210             |
| 2nd Quartile                         | 1.22 (0.76-1.95)                 |                   | 1.18 (0.88-1.60)                                     |                   |
| 3rd Quartile                         | 0.95 (0.61-1.47)                 |                   | 1.11 (0.84-1.48)                                     |                   |
| 4th Quartile (most ready)            | 0.55 (0.36-0.86)                 |                   | 0.81 (0.61-1.09)                                     |                   |
| <b>Year 2014</b> (n=60,590)          |                                  |                   |                                                      |                   |
| <i>ED pediatric readiness score:</i> |                                  |                   |                                                      |                   |
| 1st Quartile (least ready)           | referent                         | 0.033             | referent                                             | 0.765             |
| 2nd Quartile                         | 1.04 (0.63-1.73)                 |                   | 1.06 (0.75-1.50)                                     |                   |
| 3rd Quartile                         | 0.75 (0.48-1.19)                 |                   | 1.10 (0.81-1.50)                                     |                   |
| 4th Quartile (most ready)            | 0.54 (0.35-0.85)                 |                   | 1.03 (0.76-1.39)                                     |                   |
| <b>Year 2015</b> (n=60,442)          |                                  |                   |                                                      |                   |
| <i>ED pediatric readiness score:</i> |                                  |                   |                                                      |                   |
| 1st Quartile (least ready)           | referent                         | 0.004             | referent                                             | 0.186             |
| 2nd Quartile                         | 1.14 (0.69-1.88)                 |                   | 0.89 (0.61-1.28)                                     |                   |
| 3rd Quartile                         | 1.07 (0.67-1.70)                 |                   | 1.03 (0.72-1.47)                                     |                   |
| 4th Quartile (most ready)            | 0.49 (0.31-0.78)                 |                   | 0.83 (0.59-1.17)                                     |                   |
| <b>Year 2016</b> (n=63,807)          |                                  |                   |                                                      |                   |
| <i>ED pediatric readiness score:</i> |                                  |                   |                                                      |                   |
| 1st Quartile (least ready)           | referent                         | 0.242             | referent                                             | 0.392             |
| 2nd Quartile                         | 0.93 (0.55-1.59)                 |                   | 0.84 (0.58-1.21)                                     |                   |
| 3rd Quartile                         | 0.67 (0.42-1.08)                 |                   | 0.82 (0.61-1.11)                                     |                   |
| 4th Quartile (most ready)            | 0.67 (0.42-1.09)                 |                   | 0.87 (0.65-1.16)                                     |                   |
| <b>Year 2017</b> (n=61,174)          |                                  |                   |                                                      |                   |
| <i>ED pediatric readiness score:</i> |                                  |                   |                                                      |                   |
| 1st Quartile (least ready)           | referent                         | 0.085             | referent                                             | 0.754             |
| 2nd Quartile                         | 1.06 (0.62-1.80)                 |                   | 1.11 (0.77-1.60)                                     |                   |
| 3rd Quartile                         | 0.81 (0.49-1.33)                 |                   | 1.05 (0.76-1.45)                                     |                   |
| 4th Quartile (most ready)            | 0.60 (0.37-0.95)                 |                   | 0.97 (0.69-1.35)                                     |                   |

\*Data for calendar years 2012 and 2013 were combined to align with collection of data for the NPRP assessment of ED pediatric readiness.



**eTable 8. Sensitivity analyses of emergency department pediatric readiness and in-hospital mortality, with the sequential addition of hospital-level variables and year in the model (n = 372,004).**

|                                      | Primary model<br>OR (95%CI) | Model 2<br>OR (95%CI) | Model 3<br>OR (95%CI) | Model 4<br>OR (95%CI) | Model 5<br>OR (95% CI) | Model 6<br>OR (95%CI) |
|--------------------------------------|-----------------------------|-----------------------|-----------------------|-----------------------|------------------------|-----------------------|
| <i>ED Pediatric Readiness Score</i>  |                             |                       |                       |                       | OR (95% CI)            |                       |
| 1st quartile (least ready)           | referent                    | referent              | referent              | referent              | referent               | referent              |
| 2nd quartile                         | 1.16(0.87-1.54)             | 1.21(0.91-1.62)       | 1.23(0.93-1.63)       | 1.12(0.84-1.49)       | 1.16(0.87-1.54)        | 1.19(0.91-1.57)       |
| 3rd quartile                         | 0.90(0.70-1.17)             | 1.03(0.79-1.33)       | 1.06(0.82-1.36)       | 0.85(0.66-1.11)       | 0.90(0.70-1.16)        | 1.09(0.85-1.39)       |
| 4th quartile (most ready)            | 0.58(0.45-0.75)             | 0.74(0.57-0.97)       | 0.75(0.58-0.98)       | 0.54(0.41-0.71)       | 0.58(0.45-0.75)        | 0.84(0.65-1.09)       |
| Sex, Female                          | 0.99(0.91-1.08)             | 0.99(0.91-1.08)       | 0.99(0.91-1.08)       | 0.99(0.91-1.08)       | 0.99(0.91-1.08)        | 0.99(0.91-1.08)       |
| Age group                            |                             |                       |                       |                       |                        |                       |
| 0-4 years                            | 1.37(1.22-1.55)             | 1.43(1.26-1.61)       | 1.42(1.25-1.60)       | 1.37(1.21-1.54)       | 1.37(1.22-1.54)        | 1.40(1.24-1.58)       |
| 5-12 years                           | 1.35(1.20-1.51)             | 1.40(1.25-1.57)       | 1.39(1.24-1.56)       | 1.34(1.20-1.50)       | 1.35(1.21-1.52)        | 1.37(1.22-1.54)       |
| 13-15 years                          | 1.02(0.91-1.15)             | 1.05(0.93-1.17)       | 1.04(0.93-1.17)       | 1.02(0.91-1.14)       | 1.03(0.92-1.15)        | 1.03(0.92-1.16)       |
| 16-17 years                          | referent                    | referent              | referent              | referent              | referent               | referent              |
| Race                                 |                             |                       |                       |                       |                        |                       |
| White                                | referent                    | referent              | referent              | referent              | referent               | referent              |
| Black                                | 0.94(0.85-1.04)             | 0.94(0.86-1.04)       | 0.94(0.86-1.04)       | 0.94(0.85-1.04)       | 0.94(0.85-1.04)        | 0.96(0.87-1.06)       |
| Asian                                | 0.92(0.69-1.23)             | 0.93(0.69-1.24)       | 0.92(0.69-1.23)       | 0.92(0.69-1.23)       | 0.92(0.69-1.22)        | 0.95(0.71-1.26)       |
| Other                                | 1.22(1.10-1.36)             | 1.23(1.11-1.38)       | 1.22(1.10-1.36)       | 1.22(1.10-1.36)       | 1.23(1.10-1.37)        | 1.24(1.11-1.38)       |
| Any comorbid condition               | 0.62(0.55-0.70)             | 0.62(0.55-0.70)       | 0.62(0.55-0.70)       | 0.62(0.55-0.7)        | 0.62(0.55-0.70)        | 0.62(0.55-0.70)       |
| Injury mechanism                     |                             |                       |                       |                       |                        |                       |
| GSW                                  | 4.68(3.99-5.48)             | 4.79(4.08-5.62)       | 4.65(3.97-5.45)       | 4.69(4.00-5.50)       | 4.70(4.01-5.50)        | 4.67(3.98-5.47)       |
| Stabbing or other Penetrating injury | 1.15(0.85-1.56)             | 1.15(0.85-1.56)       | 1.15(0.85-1.56)       | 1.15(0.85-1.56)       | 1.15(0.85-1.56)        | 1.15(0.85-1.55)       |
| Burn, fire, flame                    | 1.83(1.36-2.46)             | 1.87(1.39-2.54)       | 1.85(1.37-2.48)       | 1.83(1.37-2.46)       | 1.83(1.36-2.46)        | 1.87(1.39-2.51)       |
| Assault                              | 1.10(0.94-1.29)             | 1.11(0.94-1.30)       | 1.10(0.94-1.29)       | 1.10(0.94-1.29)       | 1.10(0.93-1.29)        | 1.10(0.93-1.29)       |
| Fall                                 | referent                    | referent              | referent              | referent              | referent               | referent              |
| Motor vehicle                        | 0.62(0.54-0.71)             | 0.61(0.53-0.70)       | 0.62(0.54-0.70)       | 0.62(0.54-0.71)       | 0.62(0.54-0.70)        | 0.62(0.54-0.70)       |
| Bicycle                              | 0.81(0.65-1.02)             | 0.80(0.64-1.00)       | 0.81(0.65-1.02)       | 0.81(0.65-1.01)       | 0.79(0.63-0.99)        | 0.81(0.65-1.02)       |
| Pedestrian vs. auto                  | 0.99(0.85-1.15)             | 0.98(0.84-1.14)       | 0.98(0.85-1.15)       | 0.99(0.85-1.15)       | 0.98(0.84-1.14)        | 0.99(0.85-1.15)       |
| Other                                | 1.40(1.23-1.61)             | 1.41(1.23-1.61)       | 1.41(1.23-1.61)       | 1.40(1.23-1.61)       | 1.42(1.24-1.63)        | 1.40(1.23-1.61)       |
| Arrival by ambulance                 | 0.97(0.85-1.09)             | 0.98(0.86-1.11)       | 0.98(0.86-1.11)       | 0.97(0.86-1.10)       | 0.96(0.85-1.09)        | 0.99(0.88-1.12)       |
| Transfer to another hospital         | 0.35(0.30-0.40)             | 0.32(0.28-0.37)       | 0.33(0.29-0.38)       | 0.35(0.30-0.40)       | 0.35(0.30-0.40)        | 0.30(0.26-0.35)       |
| Age-adjusted hypotension             | 5.33(4.72-6.02)             | 5.48(4.86-6.19)       | 5.32(4.71-6.00)       | 5.33(4.72-6.02)       | 5.28(4.68-5.97)        | 5.28(4.68-5.96)       |
| GCS                                  |                             |                       |                       |                       |                        |                       |

|                                           |                   |                    |                    |                    |                    |                    |
|-------------------------------------------|-------------------|--------------------|--------------------|--------------------|--------------------|--------------------|
| ≤8                                        | 40.3(33.65-48.26) | 42.41(35.38-50.84) | 40.34(33.67-48.33) | 40.40(33.70-48.42) | 39.62(33.07-47.46) | 40.60(33.91-48.61) |
| 9-12                                      | 2.39(1.74-3.29)   | 2.38(1.73-3.28)    | 2.39(1.74-3.28)    | 2.39(1.74-3.29)    | 2.38(1.73-3.27)    | 2.40(1.74-3.30)    |
| ≥13                                       | referent          | referent           | referent           | referent           | referent           | referent           |
| Injury Severity Score                     | 1.05(1.04-1.05)   | 1.05(1.04-1.05)    | 1.05(1.04-1.05)    | 1.05(1.04-1.05)    | 1.05(1.04-1.05)    | 1.05(1.04-1.05)    |
| Orthopedic surgery                        | 0.62(0.56-0.68)   | 0.62(0.56-0.68)    | 0.62(0.56-0.68)    | 0.62(0.56-0.68)    | 0.62(0.57-0.69)    | 0.62(0.57-0.69)    |
| Airway or ventilation support             | 2.66(2.26-3.12)   | 2.65(2.25-3.11)    | 2.65(2.26-3.12)    | 2.66(2.26-3.13)    | 2.68(2.28-3.14)    | 2.71(2.31-3.18)    |
| Major non-orthopedic surgery              | 1.07(0.97-1.18)   | 1.07(0.97-1.18)    | 1.07(0.97-1.18)    | 1.07(0.97-1.18)    | 1.07(0.98-1.18)    | 1.07(0.98-1.18)    |
| Blood transfusion (any)                   | 2.42(2.18-2.67)   | 2.47(2.23-2.74)    | 2.42(2.19-2.68)    | 2.41(2.18-2.67)    | 2.45(2.22-2.72)    | 2.45(2.21-2.71)    |
| Pediatric trauma center level             |                   |                    |                    |                    |                    |                    |
| I                                         | -                 | referent           | -                  | -                  | -                  | -                  |
| II                                        | -                 | 1.71(1.34-2.18)    | -                  | -                  | -                  | -                  |
| III/IV                                    | -                 | 1.13(0.84-1.53)    | -                  | -                  | -                  | -                  |
| Non-pediatric trauma                      | -                 | 1.76(0.84-3.67)    | -                  | -                  | -                  | -                  |
| Annual ED pediatric trauma volume         |                   |                    |                    |                    |                    |                    |
| 1 <sup>st</sup> quartile (1-24)           | -                 | -                  | 1.75(1.22-2.52)    | -                  | -                  | -                  |
| 2 <sup>nd</sup> quartile (25-50)          | -                 | -                  | 1.99(1.56-2.54)    | -                  | -                  | -                  |
| 3 <sup>rd</sup> quartile (51-95)          | -                 | -                  | 1.38(1.11-1.72)    | -                  | -                  | -                  |
| 4 <sup>th</sup> quartile (96-1,045)       | -                 | -                  | referent           | -                  | -                  | -                  |
| Annual ED pediatric volume (all patients) |                   |                    |                    |                    |                    |                    |
| 1 <sup>st</sup> quartile (1-4,900)        | -                 | -                  | -                  | 0.79(0.61-1.04)    | -                  | -                  |
| 2 <sup>nd</sup> quartile (4,900-8,400)    | -                 | -                  | -                  | 1.00(0.75-1.34)    | -                  | -                  |
| 3 <sup>rd</sup> quartile (8,400-13,800)   | -                 | -                  | -                  | 1.07(0.84-1.35)    | -                  | -                  |
| 4 <sup>th</sup> quartile (>13,800)        | -                 | -                  | -                  | referent           | -                  | -                  |
| Year (continuous 2012-2017)               |                   |                    |                    |                    | 0.96 (0.94-0.98)   |                    |
| Adult trauma center level                 |                   |                    |                    |                    |                    |                    |
| I                                         | -                 | -                  | -                  | -                  |                    | referent           |
| II                                        | -                 | -                  | -                  | -                  |                    | 1.64(1.34-2.00)    |
| III/IV                                    | -                 | -                  | -                  | -                  |                    | 2.73(2.11-3.53)    |
| Not applicable (pediatric only)           | -                 | -                  | -                  | -                  |                    | 0.84(0.63-1.11)    |

|                                                     |       |     |     |       |       |     |
|-----------------------------------------------------|-------|-----|-----|-------|-------|-----|
| Test for trend across aOR values for wPRS quartiles | <.001 | .10 | .09 | <.001 | <.001 | .29 |
|-----------------------------------------------------|-------|-----|-----|-------|-------|-----|

GCS = Glasgow Coma Scale. Major non-orthopedic surgery included brain, spine, neck, chest, or abdominal operations. We measured ED pediatric readiness using the Weighted Pediatric Readiness Score (wPRS). The model also included region (data not shown).
