# Supplementary material
Source: PubMed Central journal article supplement (PMC8185631)
Supplement: jamapediatr-e211319-s002.pdf [file jamapediatr-e211319-s002.pdf]

## Supplemental Online Content: Nonauthor Collaborators

\*Indicates required information. Only first name, last name, and suffix will appear in PubMed.

| <b>Group Name(s):* Pediatric Readiness Study Group</b> |            |                       |                  |                                                 |                                          |                                                         |                                                                                            |
|--------------------------------------------------------|------------|-----------------------|------------------|-------------------------------------------------|------------------------------------------|---------------------------------------------------------|--------------------------------------------------------------------------------------------|
| First Name and Middle Initial(s)*                      | Last Name* | Suffix (eg, Jr, III)* | Academic Degrees | Institution                                     | Location (city, state/province, country) | Role or Contribution, eg, chair, principal investigator | Group (if more than 1 Group listed in the byline) and/or Subgroup (eg, Steering Committee) |
| Brendan                                                | Carr       |                       | MD, MS           | Mount Sinai                                     | New York, New York                       | Advisory Council                                        |                                                                                            |
| Ryan                                                   | Mutter     |                       | PhD              | Congressional Budget Office                     | Washington, DC                           | Advisory Council                                        |                                                                                            |
| Randall                                                | Burd       |                       | MD               | Children's National Hospital                    | Washington, DC                           | Advisory Council                                        |                                                                                            |
| Rachel                                                 | Ford       |                       | MPH              | Oregon Health Authority                         | Portland, OR                             | Advisory Council                                        |                                                                                            |
| Jennifer                                               | Marin      |                       | MD               | University of Pittsburgh                        | Pittsburgh, PA                           | Collaborator                                            |                                                                                            |
| Matthew                                                | Hansen     |                       | MD, MCR          | Oregon Health & Science University              | Portland, OR                             | Collaborator                                            |                                                                                            |
| Ben                                                    | Lang       |                       | MD               | University of Texas at Austin                   | Austin, TX                               | Collaborator                                            |                                                                                            |
| Stefanie                                               | Ames       |                       | MD               | University of Utah                              | Salt Lake City, UT                       | Collaborator                                            |                                                                                            |
| Devin                                                  | Puapong    |                       | MD               | Kapiolani Medical Center for Women and Children | Honolulu, HI                             | Collaborator                                            |                                                                                            |
| Charles                                                | DiMaggio   |                       | PhD              | New York University                             | New York, New York                       | Collaborator                                            |                                                                                            |
| Stephen                                                | Wall       |                       | MD, MS           | New York University                             | New York, New York                       | Collaborator                                            |                                                                                            |
| James                                                  | Miner      |                       | MD               | Hennepin Medical Center                         | Minneapolis, MN                          | Collaborator                                            |                                                                                            |
| Brooke                                                 | Lerner     |                       | PhD              | University at Buffalo                           | Buffalo, NY                              | Collaborator                                            |                                                                                            |
| Linda                                                  | Papa       |                       | MD               | Orlando Health                                  | Orlando, FL                              | Collaborator                                            |                                                                                            |
| Mark                                                   | Zonfrillo  |                       | MD, MS           | Brown University                                | Providence, RI                           | Collaborator                                            |                                                                                            |
| Nick                                                   | Mohr       |                       | MD, MS           | University of Iowa Health Care                  | Iowa City, IA                            | Collaborator                                            |                                                                                            |
| Justin                                                 | Wheeler    |                       | MS               | University of Utah                              | Salt Lake City, UT                       | Biostatistician                                         |                                                                                            |
| Anna                                                   | Levy       |                       | MS               | Oregon Health & Science University              | Portland, OR                             | Biostatistician                                         |                                                                                            |
| Ran                                                    | Wei        |                       | PhD              | University of California, Irvine                | Irvine, CA                               | Collaborator                                            |                                                                                            |
